# Supplementary material for: Development of a Broadly Protective, Self-Adjuvanting Subunit Vaccine to Prevent Infections by Pseudomonas aeruginosa
Source: Front Immunol. 2020 Nov 17;11:583008. doi: 10.3389/fimmu.2020.583008 (PMC7705240; doi:10.3389/fimmu.2020.583008)
Supplement: Supplementary file 1 [file DataSheet_1.docx]

**Supplemental Information**

**Development of a broadly protective, self-adjuvanting subunit vaccine to prevent infections by *Pseudomonas aeruginosa***

Sayan Das1¶, Debaki R. Howlader1¶, Qi Zheng1¶, R. Siva Sai Kumar1, Sean K. Whittier1,2, Ti Lu1, Johnathan D. Keith3, William D. Picking1, Susan E. Birket3 and Wendy L. Picking1,2*

1Department of Pharmaceutical Chemistry, School of Pharmacy, University of Kansas, Lawrence, KS, 2Hafion, LLC, Lawrence, KS, and 3Department of Medicine and Gregory Fleming James Cystic Fibrosis Research Center, School of Medicine, University of Alabama at Birmingham, Birmingham, AL

¶ These authors contributed equally to this work.

* To whom correspondence should be directed: Email: [wendy.picking@ku.edu](mailto:wendy.picking@ku.edu)

Keywords: *Pseudomonas aeruginosa*, Type III secretion system, vaccine, IL-17, opsonophagocytosis, protective efficacy, PcrV, PopB.

**Acronyms used in this manuscript:**

| ADPr | ADP-ribosylation |
| --- | --- |
| AEBSF | 4-benzenesulfonyl fluoride hydrochloride, protease inhibitor |
| ARF4 | ADP-ribosylation factor 4 |
| BMDC | Bone marrow dendritic cell |
| CDC | Center for Disease Control |
| DBF | IpaD-IpaB fusion |
| dmLT | Double mutant labile toxin from Enterotoxigenic *E. coli* |
| FF | Fast Flow |
| GM-CSF | granulocyte-macrophage colony-stimulating factor |
| HT | His-tag |
| HT-PcrH | HT-PcrH, the PopB chaperone |
| IN | Intranasal |
| IMAC | immobilized metal affinity chromatography |
| IpaD | *Shigella* spp T3SA tip protein |
| IpaB | *Shigella* spp T3SA first translocator protein |
| LDAO | Lauryldimethylamine oxide |
| L-DBF | The fusion of L-IpaD-IpaB |
| L-PaF | The fusion of LTA1-PcrV-PopB |
| LTA1 | A1 subunit from dmLT or LT |
| MDR | Multi-drug resistant |
| OMV | Outer membrane vesicles |
| OPK | Opsonophagocytic killing |
| Pa | *Pseudomonas aeruginosa* |
| PaF | PaFusion – fusion of PcrV and PopB |
| PcrV | Pa T3SA tip protein |
| PopB | Pa T3SA first translocator protein |
| Q column | Q FF anion exchange chromatography |
| TB | Terrific Broth |
| T3SA | Type III secretion system apparatus |
| T3SS | Type III secretion system |
| WCK | Whole cell, killed |

**Amino acid sequence of L-PaF:**

LTA1 sequence is in black. PcrV sequence is in green. Linker sequence is GS. PopB sequence is in Orange

MDNGDRLYRADSRPPDEIKRSGGLMPRGHNEYFDRGTQMNINLYDHARGTQTGFVRYDDGYVSTSLSLRSAHLAGQSILSGYSTYYIYVIATAPNMFNVNDVLGVYSPHPYEQEVSALGGIPYSQIYGWYRVNFGVIDERLHRNREYRDRYYRNLNIAPAEDGYRLAGFPPDHQAWREEPWIHHAPQGCGNSSRMEVRNLNAARELFLDELLAASAAPASAEQEELLALLRSERIVLAHAGQPLSEAQVLKALAWLLAANPSAPPGQGLEVLREVLQARRQPGAQWDLREFLVSAYFSLHGRLDEDVIGVYKDVLQTQDGKRKALLDELKALTAELKVYSVIQSQINAALSARQGIRIDAGGIDLVDPTLYGYAVGDPRWKDSPEYALLSNLDTFSGKLSIKDFLSGSPKQSGELKGLSDEYPFEKDNNPVGNFATTVSDRSRPLNDKVNEKTTLLNDTSSRYNSAVEALNRFIQKYDSVLSDILSAIGSMNPITLERAGLPYGVADAGDIPALGRPVARDVESLRVERLAAPAAASASGTGVALTPPSAASQQRLEVANRAEIASLVQAVGEDVGLARQVVLAGASTLLSAGLMSPQAFEIELAKITGEVENQQKKLKLTEIEQARKQNLQKMEDNQQKIRESEEAAKEAQKSGLAAKIFGWISAIASIIVGAIMVATGVGAAAGALMIAGGVMGVVSQSVQQAAADGLISKEVMEKLGPALMGIEMAVALLAAVVSFGGSAVGGLARLGAKIGGKAAEMTASLASKVADLGGKFGSLAGQSLSHSLKLGVQVSDLTLDVANGAAQATHSGFQAKAANRQADVQESRADLTTLQGVIERLKEELSRMLEAFQEIMERIFAMLQAKGETLHNLSSRPAAI-.

**
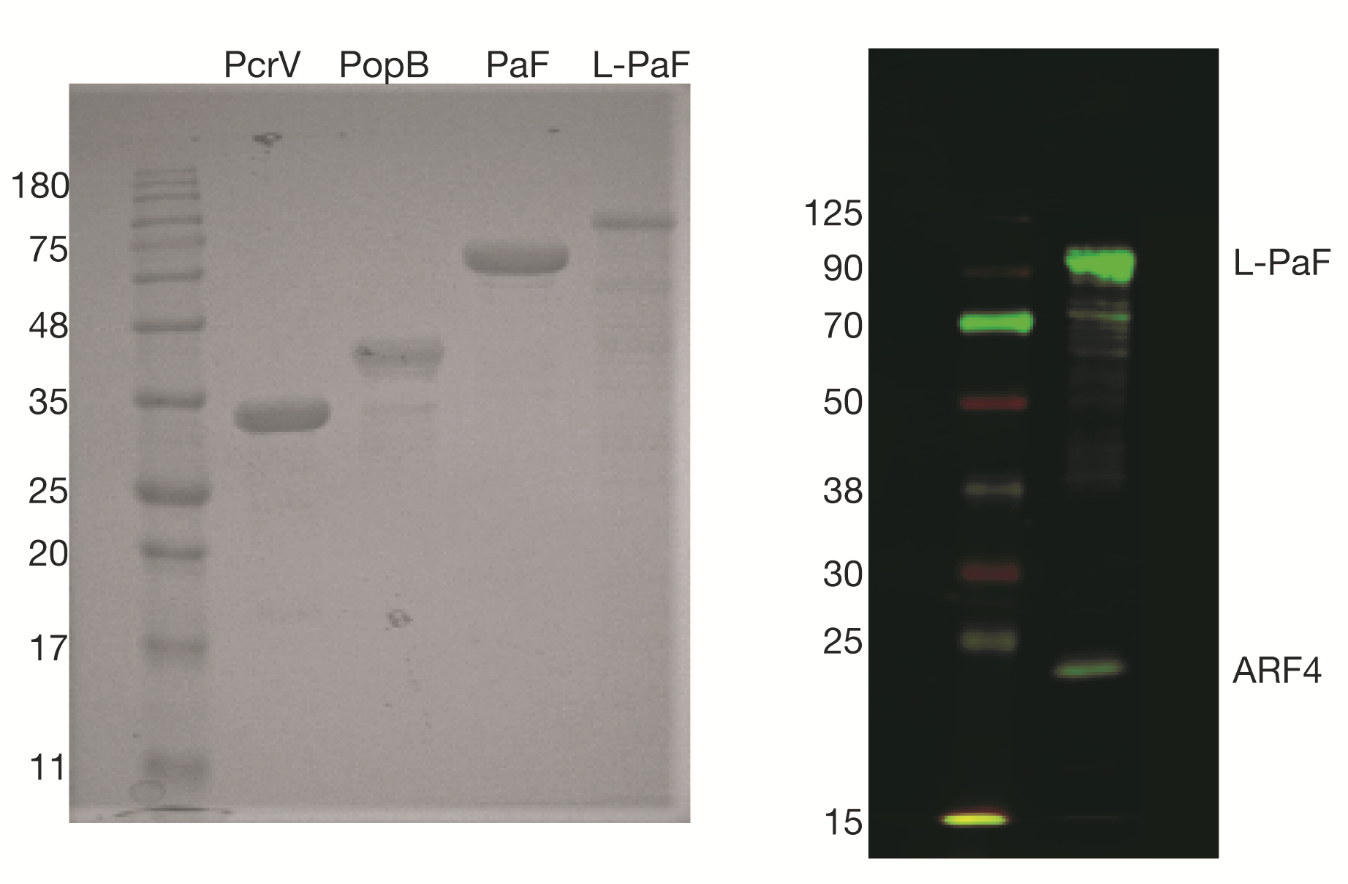
**

**Supplemental Figure S1. Preparation of the recombinant proteins used in this study.** A) Four recombinant proteins were tested in this study. PcrV (tip protein) and PopB (first translocator protein) from the *Pseudomonas aeruginosa* T3SS were purified as described. Then two novel proteins were prepared in which PcrV was fused with PopB (to give PaF) and in which PaF was fused with LTA1 (L-PaF). These four proteins are shown after separation using SDS-PAGE (0.05 µg) and staining with One-Step Blue protein gel stain (Biotium). B) The LTA1 moiety of L-PaF was then shown to transfer biotin-ADPr from biotin-NAD+ to itself and ARF4. The biotin-ADPr staining was visualized using western blot analysis followed by probing with Streptavidin–IR800.
